# Supplementary material for: Posttranslational marks control architectural and functional plasticity of the nuclear pore complex basket
Source: PubMed Central journal article supplement — J Cell Biol. 2016 Jan 18;212(2):167–80. doi: 10.1083/jcb.201506130 (PMC4738382; doi:10.1083/jcb.201506130), 2016-01-18
Supplement: JCB_201506130_sm.pdf [file JCB_201506130_sm.pdf]

Niño et al., <http://www.jcb.org/cgi/content/full/jcb.201506130/DC1>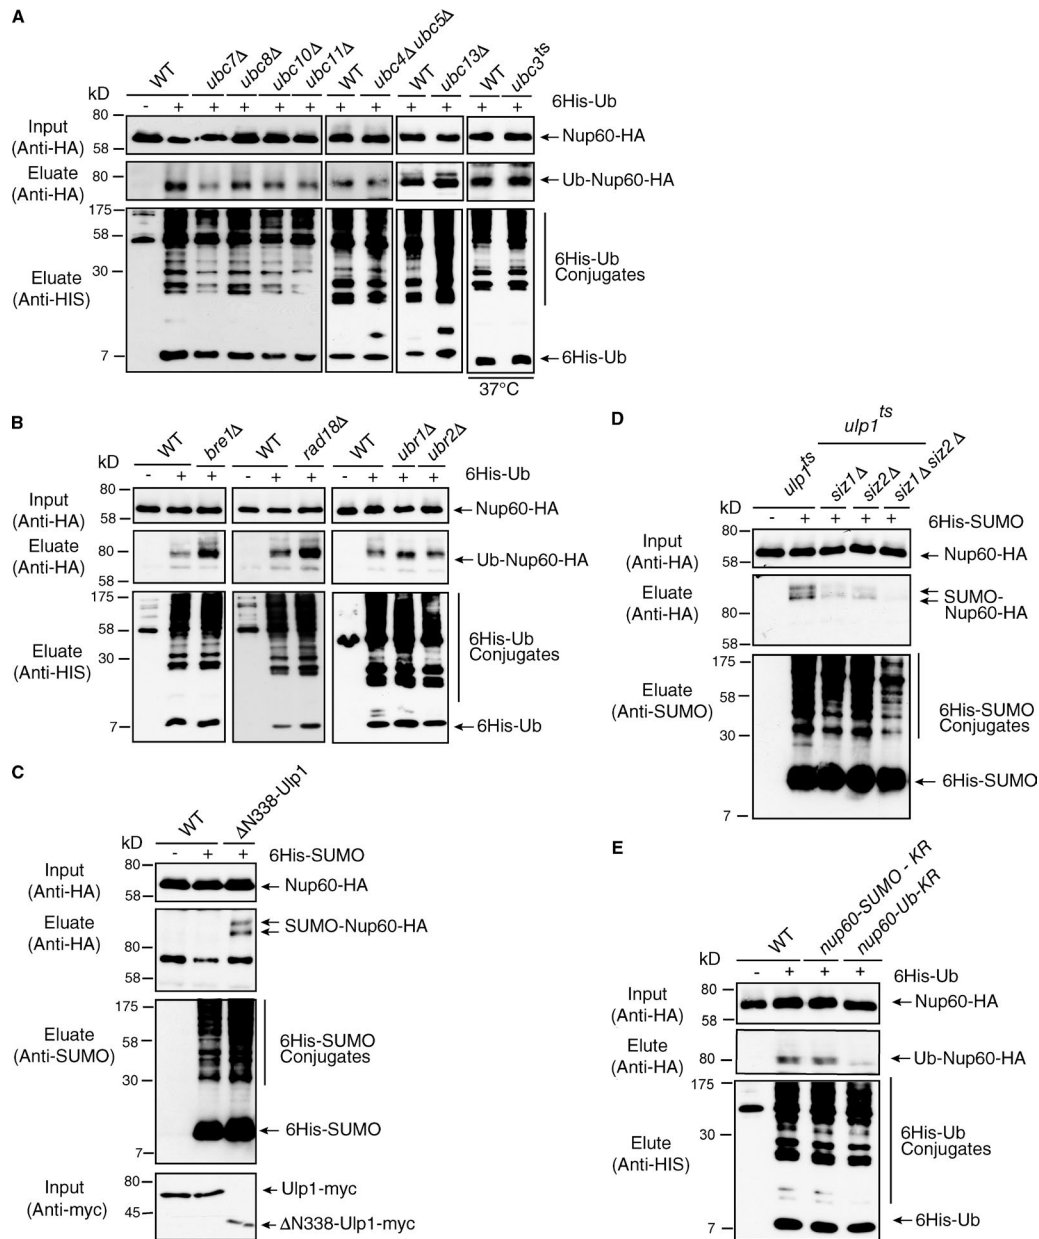

Figure S1. **Ubiquitin conjugation of genomically HA-tagged Nup60.** Ubiquitin conjugation of genomically HA-tagged Nup60 was analyzed as in Fig. 1 in WT and different *E2Δ* cells (A) and in WT and different *E3* mutant cells (B). SUMO conjugation of genomically HA-tagged Nup60 was analyzed as in Fig. 1 in WT and indicated N-terminal deletion mutants of Ulp1 (C) in WT and *ulp1* *ts* mutant cells deleted for different E3 ligases after a 2-h shift to 37°C (D). Myc-tagged Ulp1 expression in C was evaluated by Western blotting using an anti-myc antibody. (E) Ubiquitylation of Nup60-HA was determined in WT, *nup60-Ub-KR*, and *nup60-SUMO-KR* cells.

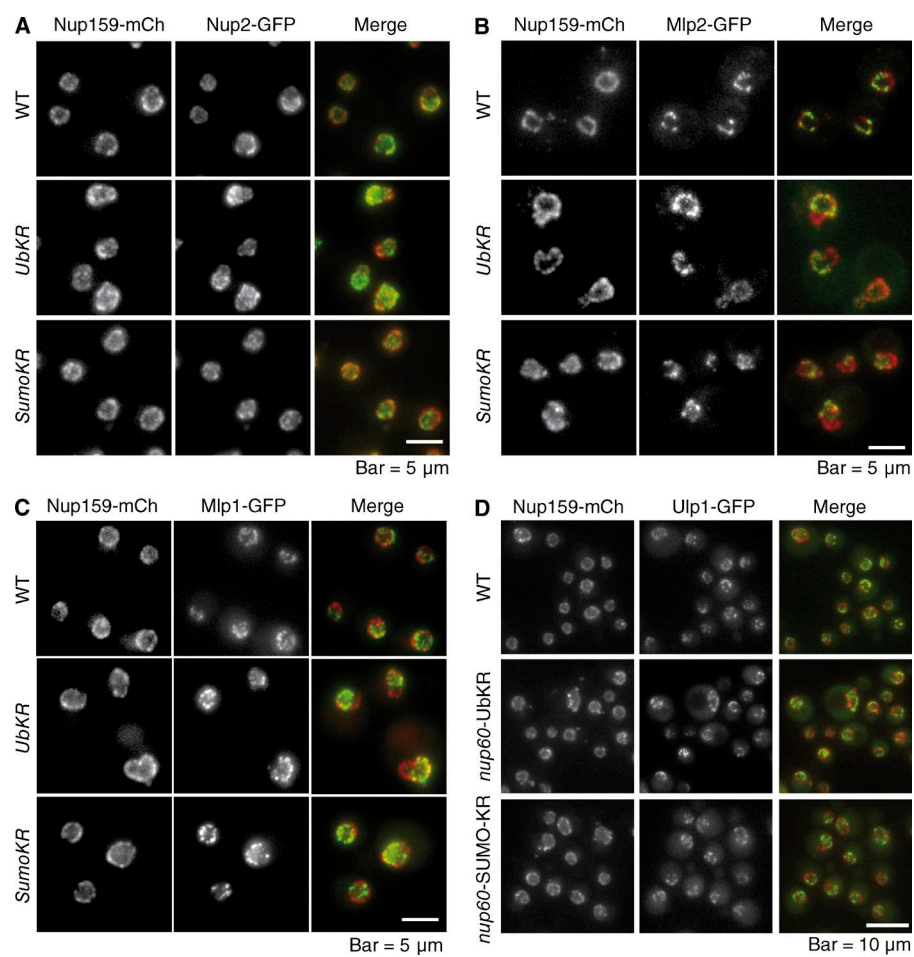

Figure S2. **Steady-state localization.** Steady-state localization of GFP-tagged Nup2 (A), Mlp2 (B), Mlp1 (B), and Ulp1 (C) in WT, *nup60-UbKR*, and *nup60-SUMO-KR* strains. The nuclear pore complex is shown by Nup159-mCherry.

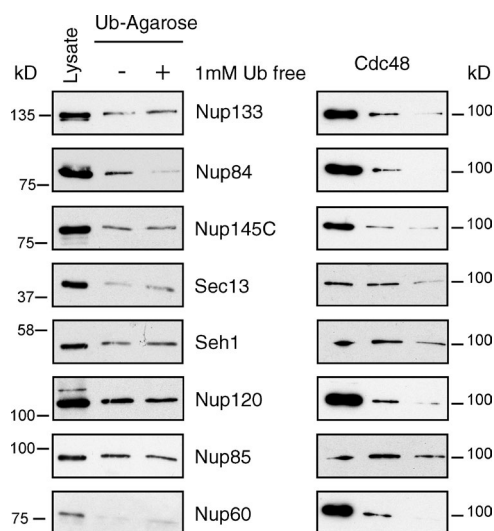

Figure S3. **Nup84 interacts with monoubiquitin.** Lysates from cells expressing HA-tagged indicated Nups were purified on monoubiquitin-coupled agarose beads in the absence (-) or presence (+) of 1 mM ubiquitin. Bound proteins were analyzed by Western blotting using anti-HA or anti-Cdc48 antibodies as an internal control for ubiquitin-binding protein. Results shown in Fig. 4 A correspond to a duplicate of results presented here for Nup60-HA, Nup84-HA, Nup133HA, and corresponding Cdc48 controls.

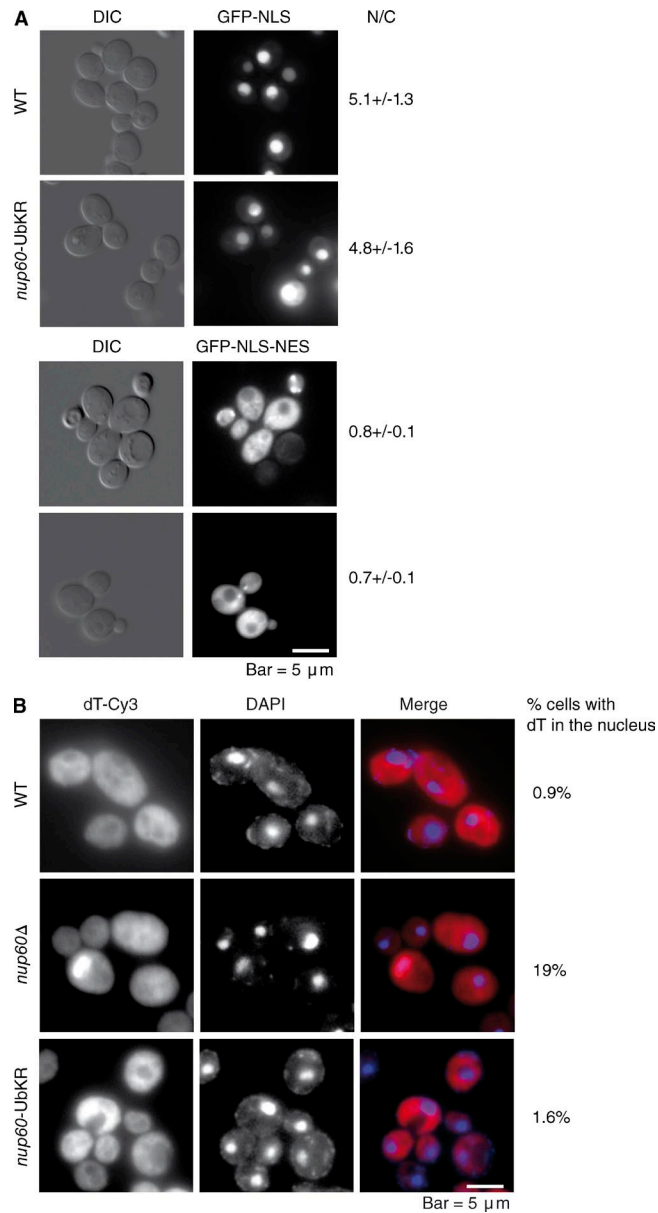

Figure S4. **The effect of Nup60 modification on the major nuclear transport pathways.** (A) WT or *nup60-UbKR* cells were transfected with a plasmid encoding GFP-NLS or GFP-NLS-NES. Cells grown at 30°C were examined by both fluorescence microscopy and DIC. Fluorescence intensity was quantified in the nucleus (N) and cytoplasm (C) using ImageJ, and N/C ratios are indicated. (B) Subcellular localization of poly(A)<sup>+</sup> RNA was analyzed by FISH using a Cy3-labeled oligo-dT probe in WT (*n* = 301), *nup60* $\Delta$  (*n* = 337), and *nup60-UbKR* (*n* = 378) strains. Percentage of cells accumulating poly(A)<sup>+</sup> RNA in the nucleus is shown on the right. Bar, 5  $\mu$ m.

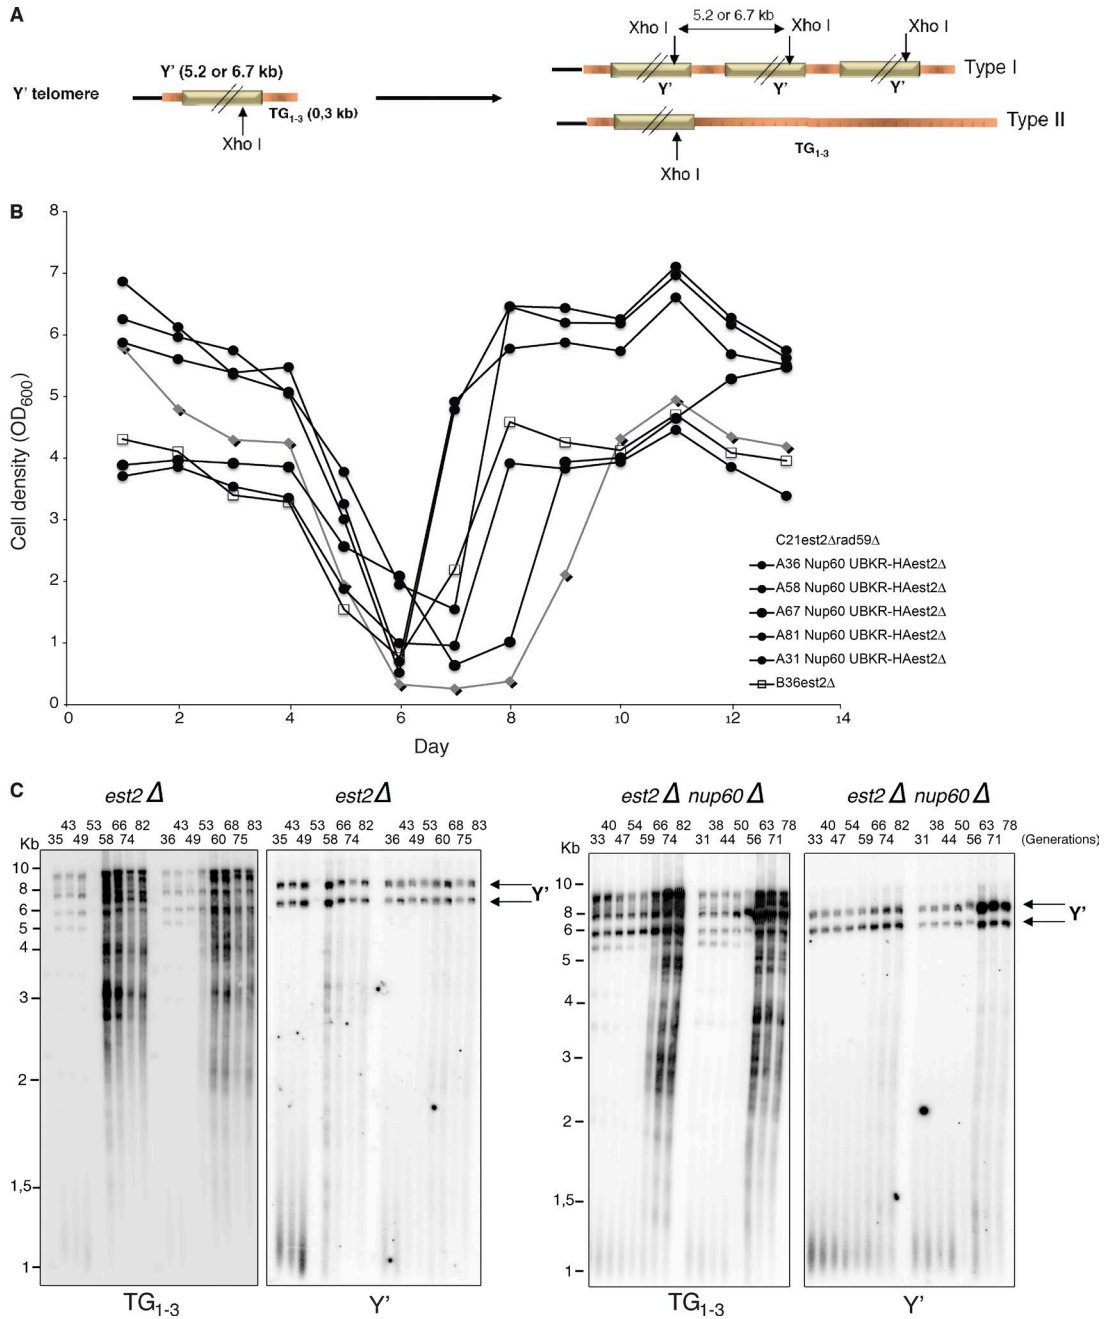

Figure S5. **Senescence curves for the individual clones analyzed in Fig. 7 B.** (A) Schematic representation of a Y' telomere and type I and type II survivors. Y' elements are of two size classes (6.7 and 5.2 kb long). (B) Senescence curves of the clones shown in Fig. 6 B. Senescence assays were started from individual spore colonies with the indicated genotypes and performed in liquid culture by propagating the cells via serial dilutions to  $10^5$  cells/ml every 24 h. (C) Survivor types of two representative clones of *est2Δ* and *est2Δ nup60Δ* were determined by Southern blot of telomeric DNA digested by XhoI and probed with either a TG<sub>1-3</sub> or a subtelomeric Y'.

Table S1. *S. cerevisiae* strains used in this study

| Strain                                   | Genotype                                                                                                  | Reference                      |
|------------------------------------------|-----------------------------------------------------------------------------------------------------------|--------------------------------|
| BY4741                                   | <i>Mat a his3Δ1 leu2Δ0 met15Δ0 ura3Δ0</i>                                                                 | EUROSCARF                      |
| <i>nup60-HA</i>                          | <i>Mat a his3Δ1 leu2Δ0 met15Δ0 ura3Δ0, nup60-HA:HIS</i>                                                   | This study                     |
| <i>ubcXΔ nup60-HA</i>                    | <i>Mat a his3Δ1 leu2Δ0 met15Δ0 ura3Δ0, nup60-HA:HIS, UBCX::kanMX6</i>                                     | This study                     |
| <i>ubc3ts Nup60-HA</i>                   | <i>MATa his3Δ1 ura3-52 trp1D leu2-3_112 ade2-1 can1-100, cdc34-2, nup60-HA:HIS</i>                        | This study                     |
| <i>rad6Δ nup60-HA</i>                    | <i>Mat a his3Δ1 leu2Δ0 met15Δ0 ura3Δ0, nup60-HA:HIS, RAD6::kanMX6</i>                                     | This study                     |
| <i>bre1Δ nup60-HA</i>                    | <i>Mat a his3Δ1 leu2Δ0 met15Δ0 ura3Δ0, nup60-HA:HIS, BRE1::kanMX6</i>                                     | This study                     |
| <i>rad18Δ nup60-HA</i>                   | <i>Mat a his3Δ1 leu2Δ0 met15Δ0 ura3Δ0, nup60-HA:HIS, RAD18::kanMX6</i>                                    | This study                     |
| <i>ubr1Δ nup60-HA</i>                    | <i>Mat a his3Δ1 leu2Δ0 met15Δ0 ura3Δ0, nup60-HA:HIS, UBR1::kanMX6</i>                                     | This study                     |
| <i>ubr2Δ nup60-HA</i>                    | <i>Mat a his3Δ1 leu2Δ0 met15Δ0 ura3Δ0, nup60-HA:HIS, UBR2::kanMX6</i>                                     | This study                     |
| <i>slx5Δ nup60-HA</i>                    | <i>Mat a his3Δ1 leu2Δ0 met15Δ0 ura3Δ0, nup60-HA:HIS, SLX5::kanMX6</i>                                     | This study                     |
| <i>slx8Δ nup60-HA</i>                    | <i>Mat a his3Δ1 leu2Δ0 met15Δ0 ura3Δ0, nup60-HA:HIS, SLX8::HPH</i>                                        | This study                     |
| <i>uls1Δ nup60-HA</i>                    | <i>Mat a his3Δ1 leu2Δ0 met15Δ0 ura3Δ0, nup60-HA:HIS, ULS1::kanMX6</i>                                     | This study                     |
| <i>ubcpΔ nup60-HA</i>                    | <i>Mat a his3Δ1 leu2Δ0 met15Δ0 ura3Δ0, nup60-HA:HIS, UBXP::kanMX6</i>                                     | This study                     |
| <i>ubp10Δ nup60-HA</i>                   | <i>Mat a his3Δ1 leu2Δ0 met15Δ0 ura3Δ0, nup60-HA:HIS, UBP10::kanMX6</i>                                    | This study                     |
| <i>Ulp1ts</i>                            | <i>Mat a, ULP1::KanMX, YCplac111-ulp1-333</i>                                                             | Vitaliano-Prunier et al., 2008 |
| <i>ulp1ts nup60-HA</i>                   | <i>Mat a, ULP1::KanMX, YCplac111-ulp1-333, nup60-HA:HIS</i>                                               | This study                     |
| <i>ulp1ts siz1Δ nup60-HA</i>             | <i>Mat a, ULP1::KanMX, YCplac111-ulp1-333, nup60-HA:HIS, SIZ1::HPH</i>                                    | This study                     |
| <i>ulp1ts siz2Δ nup60-HA</i>             | <i>Mat a, ULP1::KanMX, YCplac111-ulp1-333, nup60-HA:HIS, SIZ2::HPH</i>                                    | This study                     |
| <i>ulp1ts siz1Δ siz2Δ nup60-HA</i>       | <i>Mat a, ULP1::KanMX, YCplac111-ulp1-333, nup60-HA:HIS, SIZ1::HPH, SIZ2::NAT</i>                         | This study                     |
| <i>Ulp1-MYC nup60-HA</i>                 | <i>Mat a his3Δ1 leu2Δ0 met15Δ0 ura3Δ0, ulp1-MYC:HPH nup60-HA:HIS</i>                                      | This study                     |
| <i>ΔN388-ulp1</i>                        | <i>Mat a his3Δ1 leu2Δ0 met15Δ0 ura3Δ0, ΔN388-ulp1:LEU</i>                                                 | This study                     |
| <i>ΔN388-ulp1-MYC</i>                    | <i>Mat a his3Δ1 leu2Δ0 met15Δ0 ura3Δ0, ΔN388-ulp1-MYC:HPH</i>                                             | This study                     |
| <i>ΔN388-ulp1-MYC nup60-HA</i>           | <i>Mat a his3Δ1 leu2Δ0 met15Δ0 ura3Δ0, ΔN388-ulp1-MYC:HPH, nup60-HA:HIS</i>                               | This study                     |
| <i>nup60Δ</i>                            | <i>Mat a his3Δ1 leu2Δ0 met15Δ0 ura3Δ0, NUP60::kanMX6</i>                                                  | This study                     |
| <i>nup60Δ ulp1ts</i>                     | <i>Mat a, ULP1::KanMX, YCplac111-ulp1-333, NUP60::HPH</i>                                                 | This study                     |
| <i>nup60-HA LEU</i>                      | <i>Mat a his3Δ1 leu2Δ0 met15Δ0 ura3Δ0, nup60-HA:LEU</i>                                                   | This study                     |
| <i>nup60-UbKR</i>                        | <i>Mat a his3Δ1 leu2Δ0 met15Δ0 ura3Δ0, nup60-K(105-175)R-HA:LEU</i>                                       | This study                     |
| <i>nup60-SUMO-KR</i>                     | <i>Mat a his3Δ1 leu2Δ0 met15Δ0 ura3Δ0, nup60-K(440,442,505)R-HA:LEU</i>                                   | This study                     |
| <i>nup60-SUMO-Site1KR</i>                | <i>Mat a his3Δ1 leu2Δ0 met15Δ0 ura3Δ0, nup60-K(440,442)R-HA:LEU</i>                                       | This study                     |
| <i>nup60-SUMO-Site2KR</i>                | <i>Mat a his3Δ1 leu2Δ0 met15Δ0 ura3Δ0, nup60-K(505)R-HA:LEU</i>                                           | This study                     |
| <i>nup60-GFP</i>                         | <i>Mat a his3Δ1 leu2Δ0 met15Δ0 ura3Δ0, nup60-GFP:HIS</i>                                                  | This study                     |
| <i>nup60-GFP nup159-mCh nup84Δ</i>       | <i>Mat a his3Δ1 leu2Δ0 met15Δ0 ura3Δ0, nup60-GFP:HIS, nup84:HPH, nup159-mCherry:KAN</i>                   | This study                     |
| <i>nup60-UbKR-GFP</i>                    | <i>Mat a his3Δ1 leu2Δ0 met15Δ0 ura3Δ0, nup60-K(105-175)R-GFP:HIS</i>                                      | This study                     |
| <i>nup60-SUMO-KR-GFP</i>                 | <i>Mat a his3Δ1 leu2Δ0 met15Δ0 ura3Δ0, nup60-K(440,442,505)R-GFP:HIS</i>                                  | This study                     |
| <i>nup159-mChe</i>                       | <i>Mat a his3Δ1 leu2Δ0 met15Δ0 ura3Δ0, nup60-HA:LEU, nup159-mCherry:KAN</i>                               | This study                     |
| <i>nup60-UbKR nup159-mChe</i>            | <i>Mat a his3Δ1 leu2Δ0 met15Δ0 ura3Δ0, nup60-K(105-175)R-HA:LEU, nup159-mCherry:KAN</i>                   | This study                     |
| <i>nup60-SUMO-KR nup159-mChe</i>         | <i>Mat a his3Δ1 leu2Δ0 met15Δ0 ura3Δ0, nup60-K(440,442,505)R-HA:LEU, nup159-mCherry:KAN</i>               | This study                     |
| <i>nup2-GFP</i>                          | <i>Mat a his3Δ1 leu2Δ0 met15Δ0 ura3Δ0, nup60-HA:LEU, nup2-GFP:HIS</i>                                     | This study                     |
| <i>nup60-UbKR nup2-GFP</i>               | <i>Mat a his3Δ1 leu2Δ0 met15Δ0 ura3Δ0, nup60-K(105-175)R-HA:LEU, nup2-GFP:HIS</i>                         | This study                     |
| <i>nup60-SUMO-KR nup2-GFP</i>            | <i>Mat a his3Δ1 leu2Δ0 met15Δ0 ura3Δ0, nup60-K(440,442,505)R-HA:LEU, nup2-GFP:HIS</i>                     | This study                     |
| <i>nup2-GFP nup159-mCh</i>               | <i>Mat a his3Δ1 leu2Δ0 met15Δ0 ura3Δ0, nup60-HA:LEU, nup2-GFP:HIS, nup159-mCherry:KAN</i>                 | This study                     |
| <i>nup60-UbKR nup2-GFP nup159-mCh</i>    | <i>Mat a his3Δ1 leu2Δ0 met15Δ0 ura3Δ0, nup60-K(105-175)R-HA:LEU, nup2-GFP:HIS, nup159-mCherry:KAN</i>     | This study                     |
| <i>nup60-SUMO-KR nup2-GFP nup159-mCh</i> | <i>Mat a his3Δ1 leu2Δ0 met15Δ0 ura3Δ0, nup60-K(440,442,505)R-HA:LEU, nup2-GFP:HIS, nup159-mCherry:KAN</i> | This study                     |
| <i>mlp1-GFP</i>                          | <i>Mat a his3Δ1 leu2Δ0 met15Δ0 ura3Δ0, nup60-HA:LEU, mlp1-GFP:HIS</i>                                     | This study                     |
| <i>nup60-UbKR mlp1-GFP</i>               | <i>Mat a his3Δ1 leu2Δ0 met15Δ0 ura3Δ0, nup60-K(105-175)R-HA:LEU, mlp1-GFP:HIS</i>                         | This study                     |
| <i>nup60-SUMO-KR mlp1-GFP</i>            | <i>Mat a his3Δ1 leu2Δ0 met15Δ0 ura3Δ0, nup60-K(440,442,505)R-HA:LEU, mlp1-GFP:HIS</i>                     | This study                     |
| <i>mlp1-GFP nup159-mCh</i>               | <i>Mat a his3Δ1 leu2Δ0 met15Δ0 ura3Δ0, nup60-HA:LEU, mlp1-GFP:HIS, nup159-mCherry:KAN</i>                 | This study                     |
| <i>nup60-UbKR mlp1-GFP nup159-mCh</i>    | <i>Mat a his3Δ1 leu2Δ0 met15Δ0 ura3Δ0, nup60-K(105-175)R-HA:LEU, mlp1-GFP:HIS, nup159-mCherry:KAN</i>     | This study                     |
| <i>nup60-SUMO-KR mlp1-GFP nup159-mCh</i> | <i>Mat a his3Δ1 leu2Δ0 met15Δ0 ura3Δ0, nup60-K(440,442,505)R-HA:LEU, mlp1-GFP:HIS, nup159-mCherry:KAN</i> | This study                     |
| <i>ulp1-GFP</i>                          | <i>Mat a his3Δ1 leu2Δ0 met15Δ0 ura3Δ0, nup60-HA:LEU, ulp1-GFP:HIS</i>                                     | This study                     |
| <i>nup60-UbKR ulp1-GFP</i>               | <i>Mat a his3Δ1 leu2Δ0 met15Δ0 ura3Δ0, nup60-K(105-175)R-HA:LEU, ulp1-GFP:HIS</i>                         | This study                     |
| <i>nup60-SUMO-KR ulp1-GFP</i>            | <i>Mat a his3Δ1 leu2Δ0 met15Δ0 ura3Δ0, nup60-K(440,442,505)R-HA:LEU, ulp1-GFP:HIS</i>                     | This study                     |
| <i>ulp1-GFP nup159-mCh</i>               | <i>Mat a his3Δ1 leu2Δ0 met15Δ0 ura3Δ0, nup60-HA:LEU, ulp1-GFP:HIS, nup159-mCherry:KAN</i>                 | This study                     |

Table S1. *S. cerevisiae* strains used in this study (Continued)

| Strain                                   | Genotype                                                                                                           | Reference              |
|------------------------------------------|--------------------------------------------------------------------------------------------------------------------|------------------------|
| <i>nup60-UbKR ulp1-GFP nup159-mCh</i>    | <i>Mat a his3Δ1 leu2Δ0 met15Δ0 ura3Δ0, nup60-K(105-175)R-HA:LEU, ulp1-GFP:HIS, nup159-mCherry:KAN</i>              | This study             |
| <i>nup60-SUMO-KR ulp1-GFP nup159-mCh</i> | <i>Mat a, Mat a his3Δ1 leu2Δ0 met15Δ0 ura3Δ0, nup60-K(440,442,505)R-HA:LEU, ulp1-GFP:HIS, nup159-mCherry:KAN</i>   | This study             |
| <i>rad6Δ nup60-GFP</i>                   | <i>Mat a his3Δ1 leu2Δ0 met15Δ0 ura3Δ0, nup60-GFP:HIS, RAD6::KAN</i>                                                | This study             |
| <i>ulp1-GFP nup60Δ</i>                   | <i>Mat a his3Δ1 leu2Δ0 met15Δ0 ura3Δ0, ulp1-GFP:HIS, NUP60:HPH</i>                                                 | This study             |
| <i>NSP1-UPL1C</i>                        | <i>Mat a his3Δ1 leu2Δ0 met15Δ0 ura3Δ0, ulp1::HPH, pRS315-promULP1-GFP-NSP1-UPL1C-KAN, nup60-HA:LEU</i>             | This study             |
| <i>NSP1-UPL1C nup60-UbKR</i>             | <i>Mat a his3Δ1 leu2Δ0 met15Δ0 ura3Δ0, ulp1::HPH, pRS315-promULP1-GFP-NSP1-UPL1C-KAN, nup60-K(105-175)R-HA:LEU</i> | This study             |
| <i>mlp1Δ mlp2Δ nup60-HA</i>              | <i>Mat a his3Δ1 leu2Δ0 met15Δ0 ura3Δ0, nup60-HA:LEU, MLP1::HPH, MLP2::KAN</i>                                      | This study             |
| <i>rad53k227A bar1Δ nup60-UbKR</i>       | <i>Mat a his3Δ1 leu2Δ0 met15Δ0 ura3Δ0, nup60-K(105-175)R-HA:LEU, BAR1::HPH, rad53K227A::KAN</i>                    | This study             |
| <i>rad53k227A bar1Δ nup60 HA</i>         | <i>Mat a his3Δ1 leu2Δ0 met15Δ0 ura3Δ0, nup60-HA:LEU, BAR1::HPH, rad53K227A::KAN</i>                                | This study             |
| <i>mrc1Δ nup60-UbKR</i>                  | <i>Mat a his3Δ1 leu2Δ0 met15Δ0 ura3Δ0, nup60-K(105-175)R-HA:LEU, mrc1::HPH</i>                                     | This study             |
| <i>mrc1Δ nup60-HA</i>                    | <i>Mat a his3Δ1 leu2Δ0 met15Δ0 ura3Δ0, nup60-HA:LEU, mrc1::HPH</i>                                                 | This study             |
| <i>rad9Δ nup60-UbKR</i>                  | <i>Mat a his3Δ1 leu2Δ0 met15Δ0 ura3Δ0, nup60-K(105-175)R-HA:LEU, rad9::KAN</i>                                     | This study             |
| <i>rad9Δ nup60-HA</i>                    | <i>Mat a his3Δ1 leu2Δ0 met15Δ0 ura3Δ0, nup60-HA:LEU, rad9::KAN</i>                                                 | This study             |
| <i>mlp1Δ mlp2Δ nup60-UbKR</i>            | <i>Mat a his3Δ1 leu2Δ0 met15Δ0 ura3Δ0, nup60-K(105-175)R-HA:LEU, MLP1::HPH, MLP2::KAN</i>                          | This study             |
| <i>ubp10Δnup60-HA nup84-myc</i>          | <i>Mat a his3Δ1 leu2Δ0 met15Δ0 ura3Δ0, nup60-HA:LEU, ubp10::HPH, nup84-13myc:HIS</i>                               | This study             |
| <i>nup60-UbKR-HA nup84-myc</i>           | <i>Mat a his3Δ1 leu2Δ0 met15Δ0 ura3Δ0, nup60-UbKR-HA:LEU, nup84-13myc:HIS</i>                                      | This study             |
| <i>nup60-ProtA</i>                       | <i>his3-D200; leu2-3,2-112; lys2-801; trp-1; ura3-52, nup60-ProtA:HIS</i>                                          | Rout et al., 2000      |
| <i>nup49-ProtA</i>                       | <i>his3-D200; leu2-3,2-112; lys2-801; trp-1; ura3-52, nup49-ProtA:HIS</i>                                          | Rout et al., 2000      |
| <i>nup60-GFP nup133Δ</i>                 | <i>MATα, leu2, his3, ura3, lys2, nup133::KanMX, NUP60-GFP::HIS3</i>                                                | Palancade et al., 2007 |
| <i>nup84-GFP nup133Δ</i>                 | <i>MATα, leu2, his3, ura3, lys2, nup133::KanMX, NUP84-GFP::HIS3</i>                                                | Palancade et al., 2007 |

Table S2. Plasmids used in this study

| Plasmid                       | Description                                               | Reference           |
|-------------------------------|-----------------------------------------------------------|---------------------|
| p415-nup60-HA                 | CEN6/LEU2/ADH promoter/nup60-HA                           | This study          |
| p415-nup60-KRall-HA           | CEN6/LEU2/ADH promoter/nup60-KRall-HA (all 52 Lys to Arg) | This study          |
| YE <sub>p</sub> 352-6His-Ub   | 2μ/URA3/CUP promoter/6-His-Ub                             | Bretes et al., 2014 |
| YE <sub>p</sub> 352-6His-SUMO | 2μ/URA3/CUP promoter/6-His-SUMO                           | This study          |
| pRS315-GFP-NSP1-ΔNULP1        | CEN6/LEU2/UPL1 promoter/ GFP-NSP1-ΔNULP1                  | Texari et al., 2013 |
| pRS315-GFP-NSP1-ΔNULP1 KAN    | CEN6/KAN/UPL1 promoter/ GFP-NSP1-ΔNULP1                   | This study          |
| pWJ11344                      | RAD52-YFP                                                 | Lisby et al., 2001  |

## References

- Bretes, H., J.O. Rouviere, T. Leger, M. Oeffinger, F. Devaux, V. Doye, and B. Palancade. 2014. Sumoylation of the THO complex regulates the biogenesis of a subset of mRNPs. *Nucleic Acids Res.* 42:5043–5058. <http://dx.doi.org/10.1093/nar/gku124>
- Lisby, M., R. Rothstein, and U.H. Mortensen. 2001. Rad52 forms DNA repair and recombination centers during S phase. *Proc. Natl. Acad. Sci. USA.* 98:8276–8282. <http://dx.doi.org/10.1073/pnas.121006298>
- Palancade, B., X. Liu, M. Garcia-Rubio, A. Aguilera, X. Zhao, and V. Doye. 2007. Nucleoporins prevent DNA damage accumulation by modulating Ulp1-dependent sumoylation processes. *Mol. Biol. Cell.* 18:2912–2923. <http://dx.doi.org/10.1091/mbc.E07-02-0123>
- Rout, M.P., J.D. Aitchison, A. Suprapto, K. Hjertaas, Y. Zhao, and B.T. Chait. 2000. The yeast nuclear pore complex: composition, architecture, and transport mechanism. *J. Cell Biol.* 148:635–651. <http://dx.doi.org/10.1083/jcb.148.4.635>
- Texari, L., G. Dieppois, P. Vinciguerra, M.P. Contreras, A. Groner, A. Letourneau, and F. Stutz. 2013. The nuclear pore regulates GAL1 gene transcription by controlling the localization of the SUMO protease Ulp1. *Mol. Cell.* 51:807–818. <http://dx.doi.org/10.1016/j.molcel.2013.08.047>
- Vitaliano-Prunier, A., A. Menant, M. Hobeika, V. Géli, C. Gwizdek, and C. Dargemont. 2008. Ubiquitylation of the COMPASS component Swd2 links H2B ubiquitylation to H3K4 trimethylation. *Nat. Cell Biol.* 10:1365–1371. <http://dx.doi.org/10.1038/ncb1796>
